# Supplementary material
Source: MDPI journal article supplement (https://www.mdpi.com/1424-8247/17/5/624)
Supplement: s1 [file s1]

## Supplementary Materials

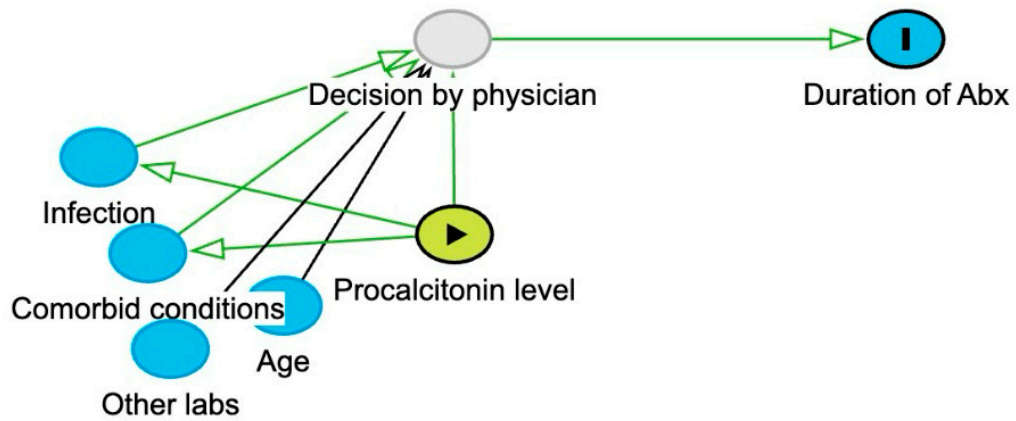

**Figure S1.** Directed acyclic graph for the underlying causal assumption between procalcitonin level and duration of antibiotics. The decision by the provider is an unobserved variable, and there was no biasing pathway to estimate the causal pathway between procalcitonin levels and the duration of antibiotics.
